# Supplementary material for: Evaluating the Magnolol Anticancer Potential in MKN-45 Gastric Cancer Cells
Source: MDPI journal article supplement (doi:10.3390/medicina59020286), 2023-02-01
Supplement: s1 [file s1]

# Supplementary Materials: Evaluating the Magnolol Anticancer Potential in MKN-45 Gastric Cancer Cells

Mahsa Naghashpour, Dian Dayer, Hadi Karami, Mahshid Naghashpour, Mahin Taheri Moghadam, Seyed Mohammad Jafar Haeri\* and Katsuhiko Suzuki\*

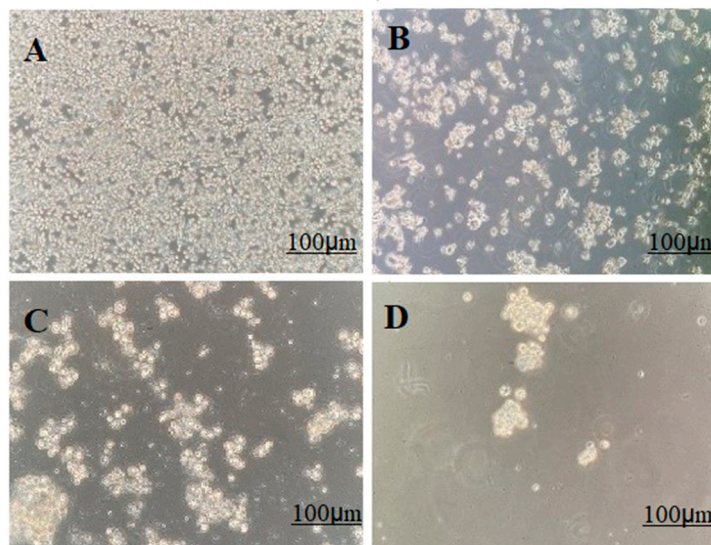

Figure S1: The changes in morphological characteristics of MKN-45 cells during magnolol and/or cisplatin treatment. A. MKN-45 gastric cancer cells without treatment (control group). B. Magnolol therapy induced a significantly reduced number of viable cells. C. Cisplatin therapy resulted in a reduced number of viable cells and colonies. D. Cisplatin and magnolol combination therapy had the maximum inhibitory effect on MKN-45 cell viability.

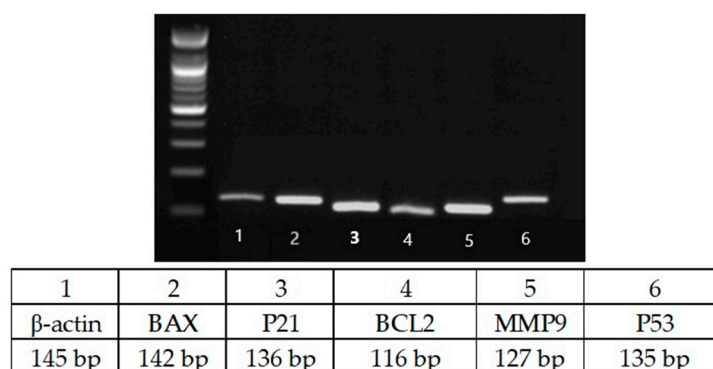

Figure S2: The results of electrophoresis. The real-time PCR products were loaded on 1% agarose gel and detected using a transilluminator (Jal Doc, Iran).
